# Supplementary material for: Fabrication of TiO2 on porous g-C3N4 by ALD for improved solar-driven hydrogen evolution
Source: PubMed Central journal article supplement — RSC Adv. 2018 Aug 30;8(54):30642–51. doi: 10.1039/c8ra05126g (PMC9085477; doi:10.1039/c8ra05126g), 2018-08-30
Supplement: RA-008-C8RA05126G-s001.pdf [file RA-008-C8RA05126G-s001.pdf]

*Supporting information to*

**Fabrication of TiO<sub>2</sub> on Porous g-C<sub>3</sub>N<sub>4</sub> by ALD for Improved  
Solar-driven Hydrogen Evolution**

Wei-Szu Liu<sup>1</sup>, Li-Chen Wang<sup>1</sup>, Tzu-Kang Chin<sup>1</sup>, Yin-Cheng Yen<sup>1</sup>, and Tsong-Pyng Perng<sup>\*,1</sup>

<sup>1</sup>Department of Materials Science and Engineering, National Tsing Hua University,  
Hsinchu 30010, Taiwan

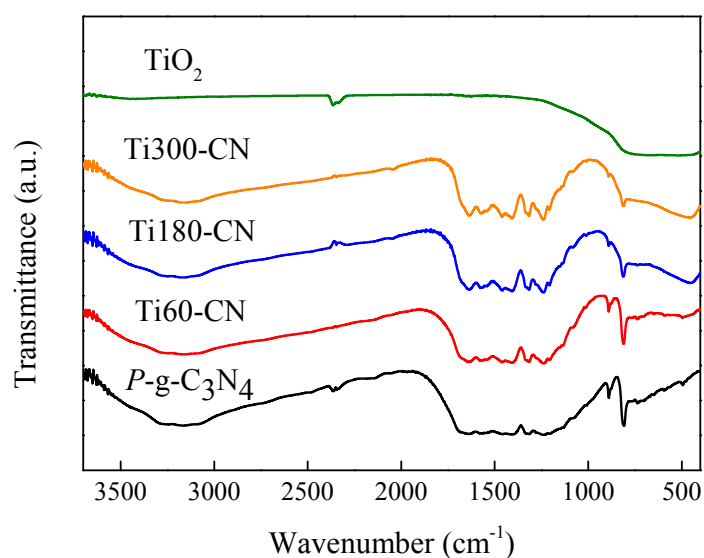

Fig. S1 FTIR spectra of *P*-g-C<sub>3</sub>N<sub>4</sub>, TiO<sub>2</sub>, and TiO<sub>2</sub>@*P*-g-C<sub>3</sub>N<sub>4</sub> composites.

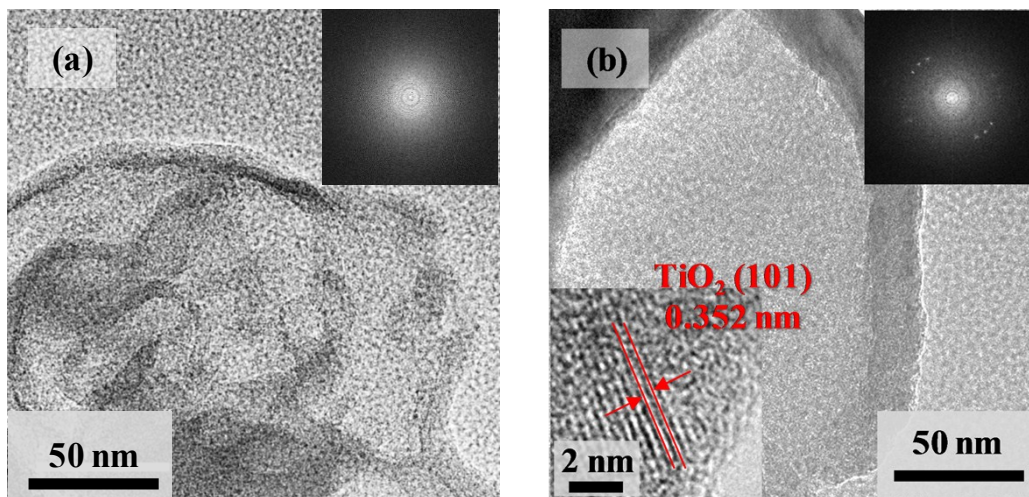

Fig. S2 HRTEM images and SAED patterns for (a) *P*-g-C<sub>3</sub>N<sub>4</sub> and (b) Ti180-CN. The inset in (b) shows the lattice image of TiO<sub>2</sub> (101).

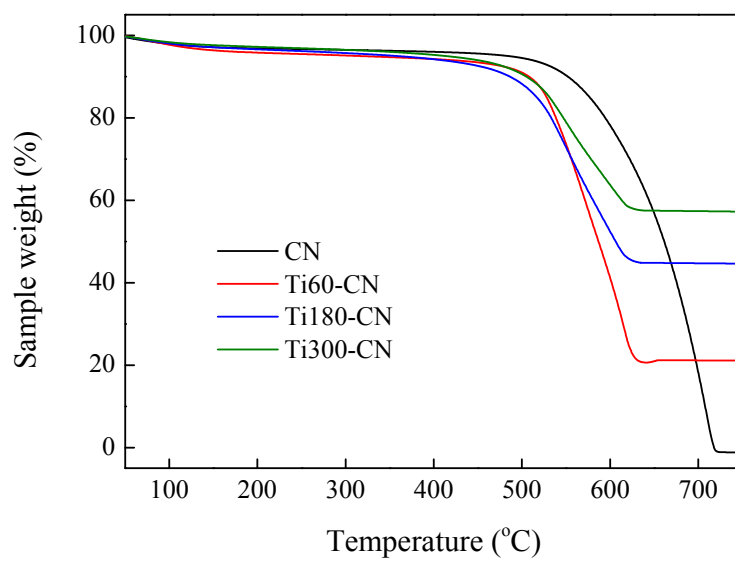

Fig. S3 TGA curves of the samples.

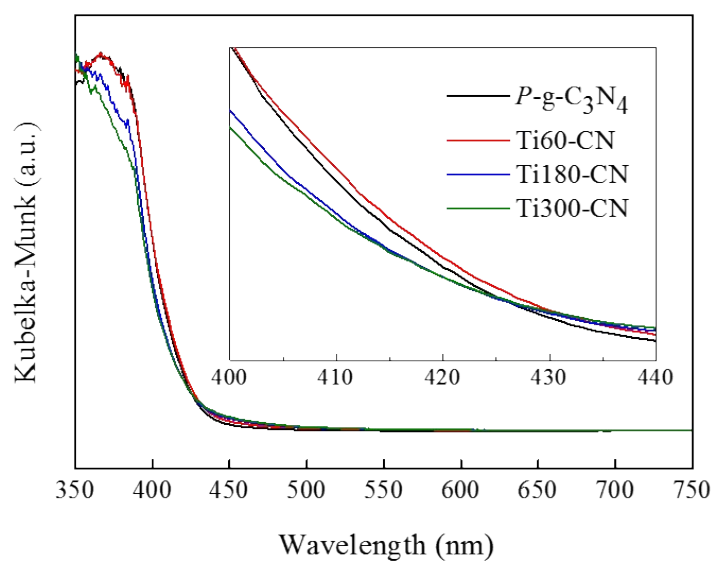

Fig. S4 UV-vis diffuse reflectance spectra of the samples. The inset shows the magnified absorption edges.

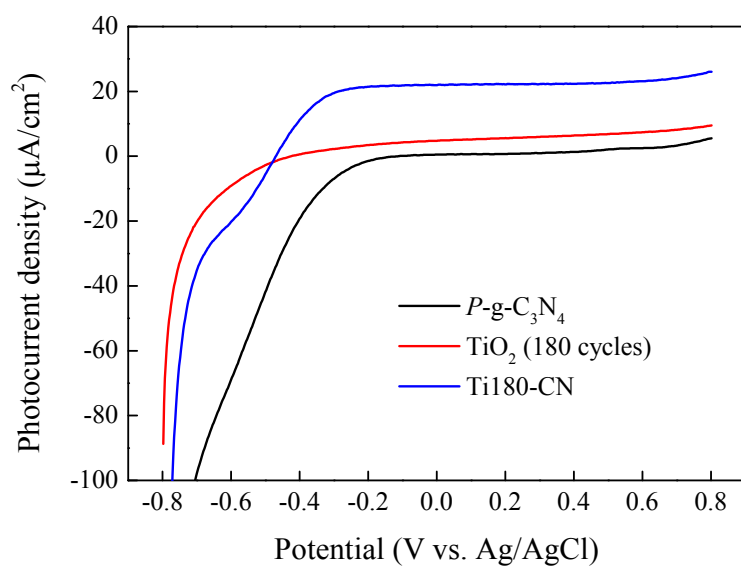

Fig. S5 Photocurrent density curves for  $P\text{-g-C}_3\text{N}_4$ ,  $\text{TiO}_2$ , and  $\text{Ti180-CN}$  in a 0.5 M  $\text{Na}_2\text{SO}_4$  aqueous solution under 150 W Xe lamp illumination with a solar filter.
